# Supplementary material for: Protocol for the development of a core domain set for hidradenitis suppurativa trial outcomes
Source: PubMed Central journal article supplement — BMJ Open. 2017 Feb 20;7(2):e014733. doi: 10.1136/bmjopen-2016-014733 (PMC5337705; doi:10.1136/bmjopen-2016-014733), 2017-02-20

## Supplementary material D

### Invitation to participate for patients

Dear HS patient,

We would like to invite you to participate in a series of 3-4 surveys, as part of an international study using a method called the Delphi process.

The aim of the study is to establish agreement on which features of the disease should be measured and reported in all clinical trials for the treatment of Hidradenitis Suppurativa (HS). This is important in order to:

- Ensure that researchers measure the features of the disease that are deemed most important to patients and professionals.
- Allow for comparison of treatments by ensuring that all clinical trials measure the same features of the disease.

The results of this study will be an important step towards the development of better treatments for HS.

Participants in the surveys include patients, doctors, nurses, and other professionals who work with the treatment of HS. Patients and professionals will have an equal say in the study, so your input as a patient is extremely important.

The questionnaires will be administered by online survey. We have planned for 3-4 surveys to be administered between July and September.

You have been identified as a key patient participant. We are asking for your participation in this important initiative, as well as your commitment to completing the 3-4 online surveys to be administered between July and September. It is important for the results of the study that all participants complete every survey.

Please respond with your commitment by email to Linnea Thorlacius, [lrit@regionsjaelland.dk](mailto:lrit@regionsjaelland.dk) on or before August 3.

You can read more about the study in the attached information sheet. Please feel free to contact us should you have any comments or questions.

Thank you for your contribution to advancing the care of patients with Hidradenitis Suppurativa.

Best regards,

Linnea Thorlacius, John Ingram, Amit Garg, Alice Gottlieb, Bente Villumsen, Robert Dellavalle, Robin Christensen and Gregor Jemec

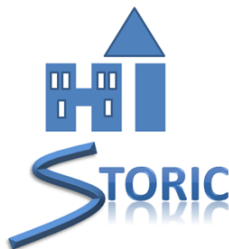

The HISTORIC (Hidradenitis Suppurativa cORE outcomes set International Collaboration) Steering group: a multinational collaboration among IDEOM, Cochrane, and Zealand University Hospital Roskilde

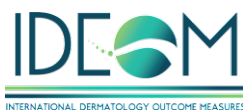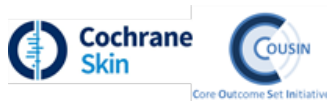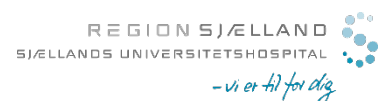

Supplement: bmjopen-2016-014733suppD.pdf [file bmjopen-2016-014733suppD.pdf]
