# Supplementary material for: Protocol for the development of a core domain set for hidradenitis suppurativa trial outcomes
Source: PubMed Central journal article supplement — BMJ Open. 2017 Feb 20;7(2):e014733. doi: 10.1136/bmjopen-2016-014733 (PMC5337705; doi:10.1136/bmjopen-2016-014733), 2017-02-20
Supplement: bmjopen-2016-014733suppC.pdf [file bmjopen-2016-014733suppC.pdf]

## **Supplementary material C**

### Item generation survey question (Delphi round zero)

*Please list all items that you consider important or relevant to Hidradenitis suppurativa*

Your items may be related to any aspect of the disease, or treatment of the disease. Items should be 'free flowing' based on your breadth of experiences with or awareness of the disease. Please include as many items as you wish. Your responses are anonymous and you should feel NO influence or pressure from any other participants.

You will only be able to submit your list of items ONCE. It is suggested you list items on a Word document first and then copy/paste into the survey textbox once you are satisfied with your list, or that you spend the time to comprehensively list your items in the survey textbox before submitting the survey.
