# Supplementary material for: Protocol for the development of a core domain set for hidradenitis suppurativa trial outcomes
Source: PubMed Central journal article supplement — BMJ Open. 2017 Feb 20;7(2):e014733. doi: 10.1136/bmjopen-2016-014733 (PMC5337705; doi:10.1136/bmjopen-2016-014733), 2017-02-20

## Supplementary material F

### Invitation for round one for all participants

Dear Participant,

Thank you for joining the HS Core Domain Set Delphi survey.

The first round has been a little delayed, but is now online.

On the registration page, you will first be asked to register of your name, email and stakeholder group, and you will then find nine questions regarding your background. The first four questions are meant for HS patients only, the last five questions are meant for HCPs only.

The next page of the survey will provide you with background information and instructions, which you should read prior to completing the survey.

All responses are completely anonymous.

For additional information on core outcome sets development, please refer to the attached summary from an organisation called COMET describing what core outcome measures are.

**The following link will take you to the survey:**

<http://ctrc.liv.ac.uk/DelphiManager/CoreDomainSetHS>

If the link does not take you to the survey after clicking on it, please copy paste the entire link, and copy it into your address bar.

Please answer this first round of the survey before August 30, 2016.

If you have any questions, please do not hesitate to contact us.

Best regards,

Linnea Thorlacius, John Ingram, Amit Garg, Bente Villumsen, Alice Gottlieb, Joseph Merola,

Robert Dellavalle, Robin Christensen and Gregor Jemec

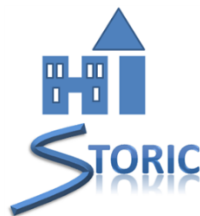

The HISTORIC (HIdradenitis SuppuraTiva coRe outcomes set International Collaboration) Steering group: a multinational collaboration among IDEOM, Cochrane, and Zealand University Hospital, Roskilde

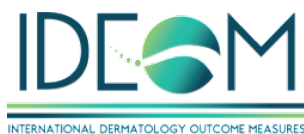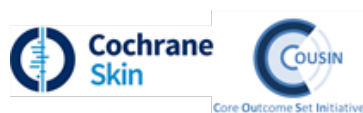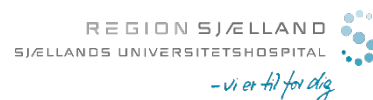

Supplement: bmjopen-2016-014733suppF.pdf [file bmjopen-2016-014733suppF.pdf]
