# Supplementary material for: Protocol for the development of a core domain set for hidradenitis suppurativa trial outcomes
Source: PubMed Central journal article supplement — BMJ Open. 2017 Feb 20;7(2):e014733. doi: 10.1136/bmjopen-2016-014733 (PMC5337705; doi:10.1136/bmjopen-2016-014733), 2017-02-20
Supplement: bmjopen-2016-014733suppG.pdf [file bmjopen-2016-014733suppG.pdf]

## **Supplementary material G**

### Information provided for all participants before Delphi Round one

Dear Delphi participant,

Thank you for participating in this important initiative.

You will find the first of the three surveys below. The list of items provided in the survey has been identified by combining the results of three studies:

1. A review of the medical literature on HS
2. Danish and USA interviews with HS patients
3. An online health care professional survey.

We expect that the final set of features to be included in all clinical trials on HS will consist of about seven core domains, each consisting of one or more items.

For additional information on the study, please see the material that was sent to you by email. Please do not hesitate to contact us, if you have any questions.

**1. Please rate each of the following items listed on their importance in being measured as an outcome in all clinical trials for Hidradenitis suppurativa. The following scale may be used to rate importance:**

- **1-3: not important to measure as an outcome in all clinical trials for HS**
- **4-6: important, but not essential to measure as an outcome in all clinical trials for HS**
- **7-9: essential to measure as an outcome in all clinical trials for HS**

**It is recognised that most items are likely to be deemed relevant and perhaps at least important to you personally. For the purpose of this survey, it is essential that you consider each item individually and decide whether it is important/essential to be measured in a clinical trial for the purpose of deciding whether a treatment works and if it is safe to use.**

**You may also provide a brief rationale for your score on any item.**

**You may also suggest a modification of definition or wording of any item.**

**An explanation of the item will be shown when you place the mouse cursor on the item.**

**You may also add any outcome which you feel are missing from the list shown, and score them using the same scale.**
